# Supplementary material for: 6-Plex microsphere immunoassay with imaging planar array detection for mycotoxins in barley
Source: Royal Society of Chemistry journal article supplement (doi:10.1039/c4an00368c), 2014-05-29
Supplement: c4an00368c1.pdf [file c4an00368c1.pdf]

## 6-plex microsphere immunoassay with imaging planar array detection for mycotoxins in barley

Jeroen Peters<sup>1</sup>, Alice Cardall<sup>2</sup>, Willem Haasnoot<sup>1</sup> and Michel W.F. Nielen<sup>1,3</sup>

1. RIKILT Wageningen UR (Institute of Food Safety), Akkermaalsbos 2, 6700 AE Wageningen, the Netherlands.
2. Nottingham Trent University, School of Science and Technology, Clifton Campus, Nottingham, NG11 8NS, United Kingdom
3. Wageningen University, Laboratory of Organic Chemistry, Dreijenplein 8, 6703 HB Wageningen, the Netherlands.

### Electronic Supplementary Information

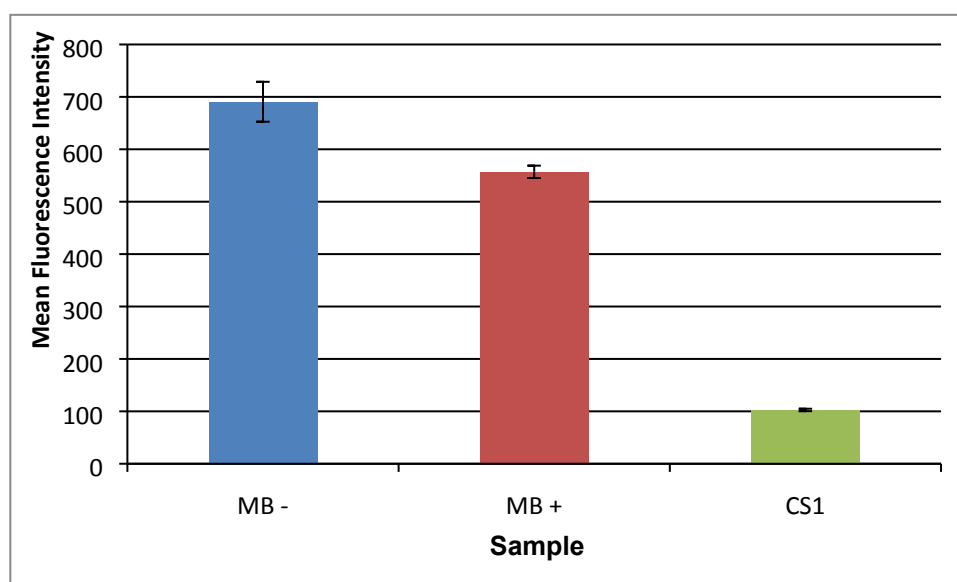

**Supplementary Fig. S1** Application of a simplified extraction method to blank barley (MB), ZEN spiked barley (MB+, 50  $\mu\text{g}/\text{kg}$ ) and ZEN reference sample (CS1, 729  $\mu\text{g}/\text{kg}$ ).
